# Supplementary material for: Peroxiredoxin 2 is associated with colorectal cancer progression and poor survival of patients
Source: PubMed Central journal article supplement (PMC5362467; doi:10.18632/oncotarget.14801), 2017-01-24
Supplement: oncotarget-08-15057-s001.pdf [file oncotarget-08-15057-s001.pdf]

## Peroxiredoxin 2 is associated with colorectal cancer progression and poor survival of patients

### Supplementary Materials

**Supplementary Table 1: The original data of this study.** See Supplementary\_Table\_1

**Supplementary Table 2: Distribution of continuous variables of the study cohort**

| Variable                | Median | Mean $\pm$ SEM | Range    | Percentile |      |
|-------------------------|--------|----------------|----------|------------|------|
|                         |        |                |          | 25th       | 75th |
| Age (years)             | 64.0   | 63.0 $\pm$ 0.7 | 35–89    | 55.0       | 70.3 |
| Tumor size (cm)         | 5.7    | 6.1 $\pm$ 0.2  | 1.5–14.6 | 4.4        | 7.2  |
| Serum CEA level (ng/mL) | 12.0   | 13.5 $\pm$ 0.7 | 0.8–55.2 | 6.7        | 16.8 |
| DFS(months)             | 55.0   | 44.9 $\pm$ 1.2 | 2–60     | 29         | 60   |
| DSS(months)             | 60.0   | 48.1 $\pm$ 1.1 | 2–60     | 35         | 60   |

Abbreviations: CEA, carcinoembryonic antigen; DFS, disease-free survival; DSS, disease-specific survival; SEM, standard error of mean.
